# Supplementary material
Source: publisher figshare collection journal article supplement (https://acs.figshare.com/ndownloader/files/10224951)
Supplement: Supplementary file 1 [file 10224951]

65
XYZ file generated by orca_plot on BaseName=1_NiCOC_bpy_Anion_opt1
  Ni      7.931831      7.535902      3.203532
  N       7.345672      9.685235      5.054528
  N       9.425317      9.685037      4.427541
  N       7.595217      6.122481      1.965585
  C       9.240410     10.862740      5.150169
  C       7.750846      4.858656      2.518596
  C       9.564350     12.948613      6.219885
  C      10.659312      9.311288      3.738136
  C       7.899886     10.862667      5.555380
  C       7.365140     11.902452      6.304447
  C       5.933864      9.318051      5.151825
  C       7.249470      6.227069      0.665400
  C       8.271081      8.986014      4.362538
  C       8.222987     12.947370      6.627885
  C      10.099667     11.903672      5.475414
  C       7.046721      5.142368     -0.150314
  C       5.056440      9.929514      4.058893
  C       7.210786      3.845714      0.395737
  C       7.557710      3.714184      1.714960
  H       6.331056     11.907496      6.618986
  H       7.845221     13.780441      7.205639
  H      10.198280     13.782725      6.489545
  H      11.134015     11.909902      5.161715
  H       7.135389      7.230866      0.281262
  H       6.769084      5.290280     -1.183895
  H       7.063962      2.968552     -0.220502
  H       7.688271      2.733158      2.149884
  H      11.490555      9.620466      4.369740
  H      10.678765      8.223558      3.677833
  H       5.879653      8.230181      5.123615
  H       5.581349      9.640752      6.129971
  H       5.217335     11.008827      4.007338
  H       4.018516      9.782808      4.365375
  N       8.517254      9.685819      1.352614
  N       6.437598      9.684122      1.979558
  C       6.621692     10.862047      1.257076
  C       6.296433     12.947941      0.187775
  C       5.203872      9.309386      2.668929
  C       7.962227     10.862932      0.851876
  C       8.496311     11.903208      0.103021
  C       9.929324      9.319644      1.255270
  C       7.592332      8.985914      2.044542
  C       7.637799     12.947642     -0.220214
  C       5.761780     11.902506      0.932028
  C      10.806290      9.931690      2.348244
  H       9.530403     11.908996     -0.211480
  H       8.015041     13.781075     -0.797786
  H       5.661973     13.781705     -0.081709
  H       4.727407     11.908038      1.245666
  H       4.372386      9.617985      2.037362
  H       5.185262      8.221623      2.729192
  H       9.984337      8.231800      1.283496
  H      10.281596      9.642612      0.277124
  H      10.644465     11.010868      2.399800
  H      11.844330      9.785873      2.041739
  N       8.267222      6.122378      4.441722
  C       8.109406      4.858602      3.889179
  C       8.613373      6.226814      5.741812
  C       8.814357      5.142090      6.557915
  C       8.647898      3.845511      6.012383
  C       8.300625      3.714102      4.693240
  H       8.729295      7.230549      6.125546
  H       9.092418      5.289913      7.591393
  H       8.793201      2.968318      6.628936
  H       8.168302      2.733120      4.258735
